# Supplementary material
Source: PubMed Central journal article supplement (PMC3969447)
Supplement: NIHMS545557-supplement-01.pdf [file NIHMS545557-supplement-01.pdf]

**Figure S1.** Trajectory of eGFR<sub>cys</sub><sup>a</sup> decline<sup>b</sup> by age and BMI<sup>a</sup> category, stratified by race/sex subgroups.

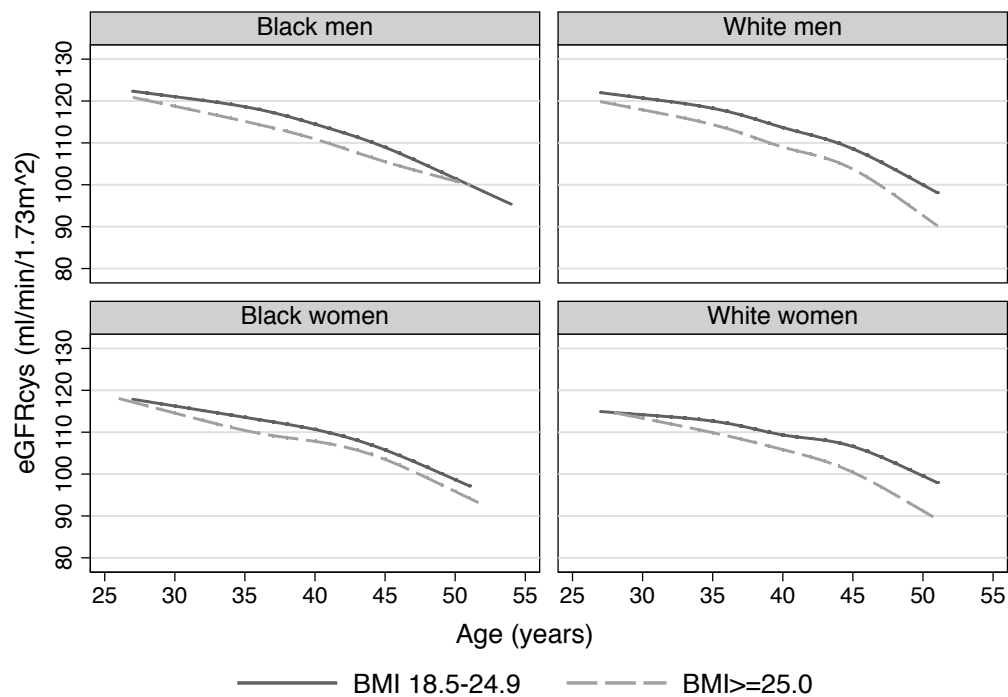

<sup>a</sup> eGFR<sub>cys</sub>=cystatin C estimated glomerular filtration rate, ml/min/1.73m<sup>2</sup>, BMI= body mass index, kg/m<sup>2</sup>

<sup>b</sup> Adjusted for baseline age, hyperlipidemia, smoking status, and physical activity
