# Supplementary material
Source: PubMed Central journal article supplement (PMC3969447)
Supplement: NIHMS545557-supplement-02.pdf [file NIHMS545557-supplement-02.pdf]

**Table S1.** Annual eGFRcys<sup>a</sup> (ml/min/1.73m<sup>2</sup>) decline, by age and BMI<sup>a</sup> category<sup>b</sup>

|        | BMI 18.5-24.9<br>(n=1207)  | BMI 25.0-29.9<br>(n=936)   |                      | BMI 30.0-39.9<br>(n=583)   |                      | BMI≥40.0<br>(n=113)        |                      |
|--------|----------------------------|----------------------------|----------------------|----------------------------|----------------------|----------------------------|----------------------|
|        | Δ eGFRcys/year<br>(95% CI) | Δ eGFRcys/year<br>(95% CI) | p-value <sup>c</sup> | Δ eGFRcys/year<br>(95% CI) | p-value <sup>c</sup> | Δ eGFRcys/year<br>(95% CI) | p-value <sup>c</sup> |
| Age 30 | -0.39<br>(-0.59, -0.18)    | -0.80<br>(-1.05, -0.55)    | 0.01                 | -0.60<br>(-0.91, -0.30)    | 0.2                  | -0.58<br>(-1.28, 0.12)     | 0.6                  |
| Age 35 | -0.53<br>(-0.65, -0.42)    | -0.81<br>(-0.94, -0.67)    | 0.002                | -0.70<br>(-0.87, -0.54)    | 0.09                 | -0.80<br>(-1.16, -0.44)    | 0.1                  |
| Age 40 | -0.71<br>(-0.83, -0.59)    | -0.78<br>(-0.92, -0.64)    | 0.5                  | -0.81<br>(-1.00, -0.63)    | 0.4                  | -1.25<br>(-1.68, -0.83)    | 0.02                 |
| Age 45 | -1.19<br>(-1.32, -1.07)    | -1.34<br>(-1.48, -1.20)    | 0.1                  | -1.53<br>(-1.71, -1.35)    | 0.002                | -1.49<br>(-1.89, -1.08)    | 0.2                  |
| Age 50 | -1.58<br>(-1.85, -1.32)    | -1.67<br>(-1.98, -1.37)    | 0.7                  | -2.03<br>(-2.41, -1.65)    | 0.06                 | -1.67<br>(-2.51, -0.84)    | 0.8                  |

<sup>a</sup> eGFRcys=cystatin C estimated glomerular filtration rate, ml/min/1.73m<sup>2</sup>, BMI= body mass index, kg/m<sup>2</sup>

<sup>b</sup>Adjusted for baseline age, race, sex, hyperlipidemia, smoking status, and physical activity

<sup>c</sup>p-value for difference in rate of decline compared to reference BMI category (18.5-24.9)
