# Supplementary material
Source: PubMed Central journal article supplement (PMC3969447)
Supplement: NIHMS545557-supplement-03.pdf [file NIHMS545557-supplement-03.pdf]

**Table S2.** Annual eGFRcys (ml/min/1.73m<sup>2</sup>) decline, by age and BMI<sup>a</sup> category, multivariate model<sup>b</sup> adjusted for change in BMI over the study period

|        | BMI 18.5-24.9<br>(n=1207)  | BMI 25.0-29.9<br>(n=936)   |                      | BMI 30.0-39.9<br>(n=583)   |                      | BMI≥40.0<br>(n=113)        |                      |
|--------|----------------------------|----------------------------|----------------------|----------------------------|----------------------|----------------------------|----------------------|
|        | Δ eGFRcys/year<br>(95% CI) | Δ eGFRcys/year<br>(95% CI) | p-value <sup>c</sup> | Δ eGFRcys/year<br>(95% CI) | p-value <sup>c</sup> | Δ eGFRcys/year<br>(95% CI) | p-value <sup>c</sup> |
| Age 30 | -0.31<br>(-0.52, -0.10)    | -0.69<br>(-0.94, -0.44)    | 0.02                 | -0.52<br>(-0.82, -0.21)    | 0.3                  | -0.53<br>(-1.24, 0.17)     | 0.6                  |
| Age 35 | -0.46<br>(-0.58, -0.34)    | -0.72<br>(-0.85, -0.58)    | 0.003                | -0.61<br>(-0.77, -0.45)    | 0.1                  | -0.77<br>(-1.13, -0.40)    | 0.1                  |
| Age 40 | -0.65<br>(-0.77, -0.52)    | -0.70<br>(-0.84, -0.55)    | 0.6                  | -0.72<br>(-0.90, -0.53)    | 0.5                  | -1.21<br>(-1.64, -0.79)    | 0.01                 |
| Age 45 | -1.11<br>(-1.24, -0.99)    | -1.26<br>(-1.40, -1.12)    | 0.1                  | -1.46<br>(-1.64, -1.28)    | 0.002                | -1.48<br>(-1.89, -1.08)    | 0.09                 |
| Age 50 | -1.49<br>(-1.76, -1.22)    | -1.62<br>(-1.93, -1.32)    | 0.5                  | -1.95<br>(-2.33, -1.58)    | 0.05                 | -1.72<br>(-2.55, -0.89)    | 0.6                  |

<sup>a</sup> eGFRcys=cystatin C estimated glomerular filtration rate, ml/min/1.73m<sup>2</sup>, BMI= body mass index, kg/m<sup>2</sup>

<sup>b</sup>Multivariate model=adjusted for baseline age, race, sex, hyperlipidemia, smoking status, and physical activity

<sup>c</sup>p-value for difference in rate of decline compared to reference BMI category (18.5-24.9)
